# Supplementary material
Source: PubMed Central journal article supplement (PMC6735405)
Supplement: jamaoncol-5-1582-s002.pdf [file jamaoncol-5-1582-s002.pdf]

## Supplementary Online Content

Abou-Alfa GK, Shi Q, Knox JJ, Kaubisch A, Niedzwiecki D, Posey J, Tan Jr BR, Kavan P, Goel R, Lammers PE, Bekaii-Saab TS, Tam VC, Rajdev L, Kelley RK, El Dika I, Zemla T, Potaracke RI, Balletti J, El-Khoueiry AB, Harding JH, Suga JM, Schwartz LH, Goldberg RM, Bertagnolli MM, Meyerhardt J, O'Reilly EM, Venook AP. Assessment of treatment with sorafenib plus doxorubicin vs sorafenib alone in patients with advanced hepatocellular carcinoma: phase 3 CALGB 80802 randomized clinical trial. Published online September 5, 2019. *JAMA Oncol*. doi:10.1001/jamaoncol.2019.2792

**eTable 1.** Sorafenib dose modifications for hypertension

**eTable 2.** Sorafenib dose modifications for hand-foot skin reaction HFSR, palmar-plantar erythrodysesthesia

**eTable 3.** Dose modifications for hepatic toxicity

**eTable 4.** Observed adverse events regardless of attribution by grade and treatment arm

This supplementary material has been provided by the authors to give readers additional information about their work.

**eTable 1 Sorafenib Dose Modifications for Hypertension**

| <b>Blood Pressure</b>                                  | <b>Sorafenib Dose Modification</b>                                                                                                    |
|--------------------------------------------------------|---------------------------------------------------------------------------------------------------------------------------------------|
| Controlled with medication (to <140/90 mmHg)           | Continue sorafenib                                                                                                                    |
| >140/90 and ≤160/100 mmHg                              | Continue sorafenib. Consider adding or adjusting anti-hypertensive medications (e.g., calcium channel blockers)                       |
| Persistent (>160/100 mmHg) or symptomatic hypertension | Interrupt sorafenib. Resume when blood pressure improves to <160/100. If sorafenib is interrupted for ≥3 weeks, discontinue sorafenib |
| Grade 4                                                | Discontinue all protocol therapy                                                                                                      |

**eTable 2 Sorafenib Dose Modifications for Hand-Foot Skin Reaction HFSR, palmar-plantar erythrodysesthesia**

| <b>Grade</b> | <b>Apperance</b>                              | <b>Dose Modification</b>                                                                                        |
|--------------|-----------------------------------------------|-----------------------------------------------------------------------------------------------------------------|
| Grade 2      | 1 <sup>st</sup> appearance                    | Interrupt sorafenib until skin toxicity improves to ≤ grade 1, then resume sorafenib at the previous dose level |
| Grade 2      | 2 <sup>nd</sup> or 3 <sup>rd</sup> appearance | Interrupt sorafenib until skin toxicity improves to ≤ grade 1, then resume sorafenib at one reduced dose level  |
| Grade 2      | 4 <sup>th</sup> appearance                    | Discontinue all protocol therapy                                                                                |
| Grade 3      | 1 <sup>st</sup> or 2 <sup>nd</sup> appearance | Interrupt sorafenib until skin toxicity improves to ≤ grade 1, then resume sorafenib at one reduced dose level  |
| Grade 3      | 3 <sup>rd</sup> appearance                    | Discontinue all protocol therapy                                                                                |

Following a full cycle of reduced dose sorafenib with no rash (maculo-papular) or HFSR (palmar-plantar erythrodysesthesia) of ≥ grade 1 severity, the dose of sorafenib may be re-escalated to the previous dose level. (Note: Re-escalation is only allowed in the case of skin toxicity.)

**eTable 3 Dose Modifications for Hepatic Toxicity**

| <b>Patients on full starting doxorubicin dose (60 mg/m<sup>2</sup>) and sorafenib 400 mg po twice daily</b> |                                                                    |
|-------------------------------------------------------------------------------------------------------------|--------------------------------------------------------------------|
| <b>Bilirubin 1.3-3.0 mg/dL</b>                                                                              | Decrease by one dose level all drugs for all subsequent cycles     |
| <b>Bilirubin &gt; 3.0 mg/dL</b>                                                                             | Discontinue all protocol therapy                                   |
| <b>Patients on reduced starting doxorubicin dose (30 mg/m<sup>2</sup>) and sorafenib 400 mg po daily</b>    |                                                                    |
| <b>Bilirubin 1.3-3.0 mg/dL</b>                                                                              | Continue on same starting dose all drugs for all subsequent cycles |
| <b>Bilirubin &gt; 3.0 mg/dL</b>                                                                             | Discontinue all protocol therapy                                   |

**eTable 4 Observed Adverse Events Regardless of Attribution by Grade and Treatment Arm**

| Adverse Event and Grade               | Doxorubicin + Sorafenib<br>(N=167) | Sorafenib<br>(N=171) | p value <sup>1</sup> |
|---------------------------------------|------------------------------------|----------------------|----------------------|
| <b>General</b>                        |                                    |                      |                      |
| Fatigue                               |                                    |                      | 0.0084               |
| 1                                     | 48 (28.7%)                         | 66 (39.1%)           |                      |
| 2                                     | 61 (36.5%)                         | 35 (20.5%)           |                      |
| 3                                     | 20 (12.0%)                         | 17 (10.1%)           |                      |
| 4                                     | 1 (0.6%)                           | 0 (0.0%)             |                      |
| <b>Cardiology</b>                     |                                    |                      |                      |
| Left Ventricular Systolic Dysfunction |                                    |                      | 0.1187               |
| 1                                     | 3 (1.8%)                           | 1 (0.6%)             |                      |
| 2                                     | 1 (0.6%)                           | 0 (0.0%)             |                      |
| 3                                     | 4 (2.4%)                           | 0 (0.0%)             |                      |
| 4                                     | 1 (0.6%)                           | 0 (0.0%)             |                      |
| Ejection Fraction Decreased           |                                    |                      | 0.0021               |
| 1                                     | 3 (1.8%)                           | 0 (0.0%)             |                      |
| 2                                     | 5 (3.0%)                           | 1 (0.6%)             |                      |
| 3                                     | 8 (4.8%)                           | 0 (0.0%)             |                      |
| Hypertension                          |                                    |                      | 0.0351               |
| 1                                     | 17 (10.2%)                         | 16 (9.5%)            |                      |
| 2                                     | 30 (18.0%)                         | 34 (20.1%)           |                      |
| 3                                     | 8 (4.8%)                           | 23 (13.6%)           |                      |
| <b>Dermatology</b>                    |                                    |                      |                      |
| Palmar-Plantar Erythro-Dysesthesia    |                                    |                      | 0.7096               |
| 1                                     | 15 (9.0%)                          | 21 (12.4%)           |                      |
| 2                                     | 23 (13.9%)                         | 25 (14.8%)           |                      |
| 3                                     | 22 (13.3%)                         | 24 (14.2%)           |                      |
| Skin Ulceration                       |                                    |                      | 0.1202               |
| 1                                     | 7 (4.2%)                           | 2 (1.2%)             |                      |
| 2                                     | 2 (1.2%)                           | 6 (3.6%)             |                      |
| 3                                     | 1 (0.6%)                           | 0 (0.0%)             |                      |
| <b>Endocrinology</b>                  |                                    |                      |                      |
| Hypothyroidism                        |                                    |                      | 0.9996               |
| 1                                     | 2 (1.2%)                           | 2 (1.2%)             |                      |
| 2                                     | 3 (1.8%)                           | 3 (1.8%)             |                      |
| <b>Gastrointestinal</b>               |                                    |                      |                      |

| Adverse Event and Grade          | Doxorubicin + Sorafenib<br>(N=167) | Sorafenib<br>(N=171) | p value <sup>1</sup> |
|----------------------------------|------------------------------------|----------------------|----------------------|
| <b>Nausea</b>                    |                                    |                      | 0.1069               |
| 1                                | 43 (25.9%)                         | 49 (29.0%)           |                      |
| 2                                | 30 (18.1%)                         | 15 (8.9%)            |                      |
| 3                                | 11 (6.6%)                          | 12 (7.1%)            |                      |
| <b>Oral Mucositis</b>            |                                    |                      | 0.0004 <sup>1</sup>  |
| 1                                | 36 (21.7%)                         | 19 (11.2%)           |                      |
| 2                                | 14 (8.4%)                          | 9 (5.3%)             |                      |
| 3                                | 15 (9.0%)                          | 4 (2.4%)             |                      |
| <b>Abdominal Pain</b>            |                                    |                      | 0.4276 <sup>1</sup>  |
| 1                                | 34 (20.5%)                         | 38 (22.5%)           |                      |
| 2                                | 25 (15.1%)                         | 29 (17.2%)           |                      |
| 3                                | 8 (4.8%)                           | 14 (8.3%)            |                      |
| <b>Diarrhea</b>                  |                                    |                      | 0.4185 <sup>1</sup>  |
| 1                                | 46 (27.7%)                         | 49 (29.0%)           |                      |
| 2                                | 28 (16.9%)                         | 18 (10.7%)           |                      |
| 3                                | 12 (7.2%)                          | 12 (7.1%)            |                      |
| <b>Hematology</b>                |                                    |                      |                      |
| <b>Neutropenia</b>               |                                    |                      | <0.0001 <sup>1</sup> |
| 1                                | 5 (3.0%)                           | 5 (3.0%)             |                      |
| 2                                | 15 (9.0%)                          | 5 (3.0%)             |                      |
| 3                                | 21 (12.7%)                         | 1 (0.6%)             |                      |
| 4                                | 40 (24.1%)                         | 0 (0.0%)             |                      |
| <b>Decreased Platelets Count</b> |                                    |                      | <0.0001 <sup>1</sup> |
| 1                                | 39 (23.5%)                         | 51 (30.2%)           |                      |
| 2                                | 19 (11.4%)                         | 13 (7.7%)            |                      |
| 3                                | 21 (12.7%)                         | 2 (1.2%)             |                      |
| 4                                | 8 (4.8%)                           | 2 (1.2%)             |                      |
| <b>Hematuria</b>                 |                                    |                      | 0.7983 <sup>1</sup>  |
| 1                                | 6 (3.6%)                           | 4 (2.4%)             |                      |
| 2                                | 1 (0.6%)                           | 1 (0.6%)             |                      |
| <b>Epistaxis</b>                 |                                    |                      | 0.1966 <sup>1</sup>  |
| 1                                | 6 (3.6%)                           | 14 (8.2%)            |                      |
| 2                                | 1 (0.6%)                           | 1 (0.6%)             |                      |

<sup>1</sup>Chi-Square
