# Supplementary material
Source: PubMed Central journal article supplement (PMC6735405)
Supplement: jamaoncol-5-1582-s003.pdf [file jamaoncol-5-1582-s003.pdf]

## Data Sharing Statement

### Data

**Data available:** Yes

**Data types:** Deidentified participant data

**How to access data:** The individual patient data will be available through NCTN/NCORP Data Archive (<https://nctn-data-archive.nci.nih.gov/>) within six months of the publication date.

**When available:** beginning date: 12-01-2019

### Supporting Documents

**Document types:** None

### Additional Information

**Who can access the data:** The individual patient data will be available through NCTN/NCORP Data Archive (<https://nctn-data-archive.nci.nih.gov/>) within six months of the publication date.

**Types of analyses:** The individual patient data will be available through NCTN/NCORP Data Archive (<https://nctn-data-archive.nci.nih.gov/>) within six months of the publication date.

**Mechanisms of data availability:** The individual patient data will be available through NCTN/NCORP Data Archive (<https://nctn-data-archive.nci.nih.gov/>) within six months of the publication date.
